# Supplementary material for: Identification of testicular cancer immune infiltrates and novel immune cell subtypes
Source: PubMed Central journal article supplement (PMC10549230; doi:10.1002/2211-5463.13688), 2023-08-10
Supplement: FEB4-13-1967-s002.pdf [file FEB4-13-1967-s002.pdf]

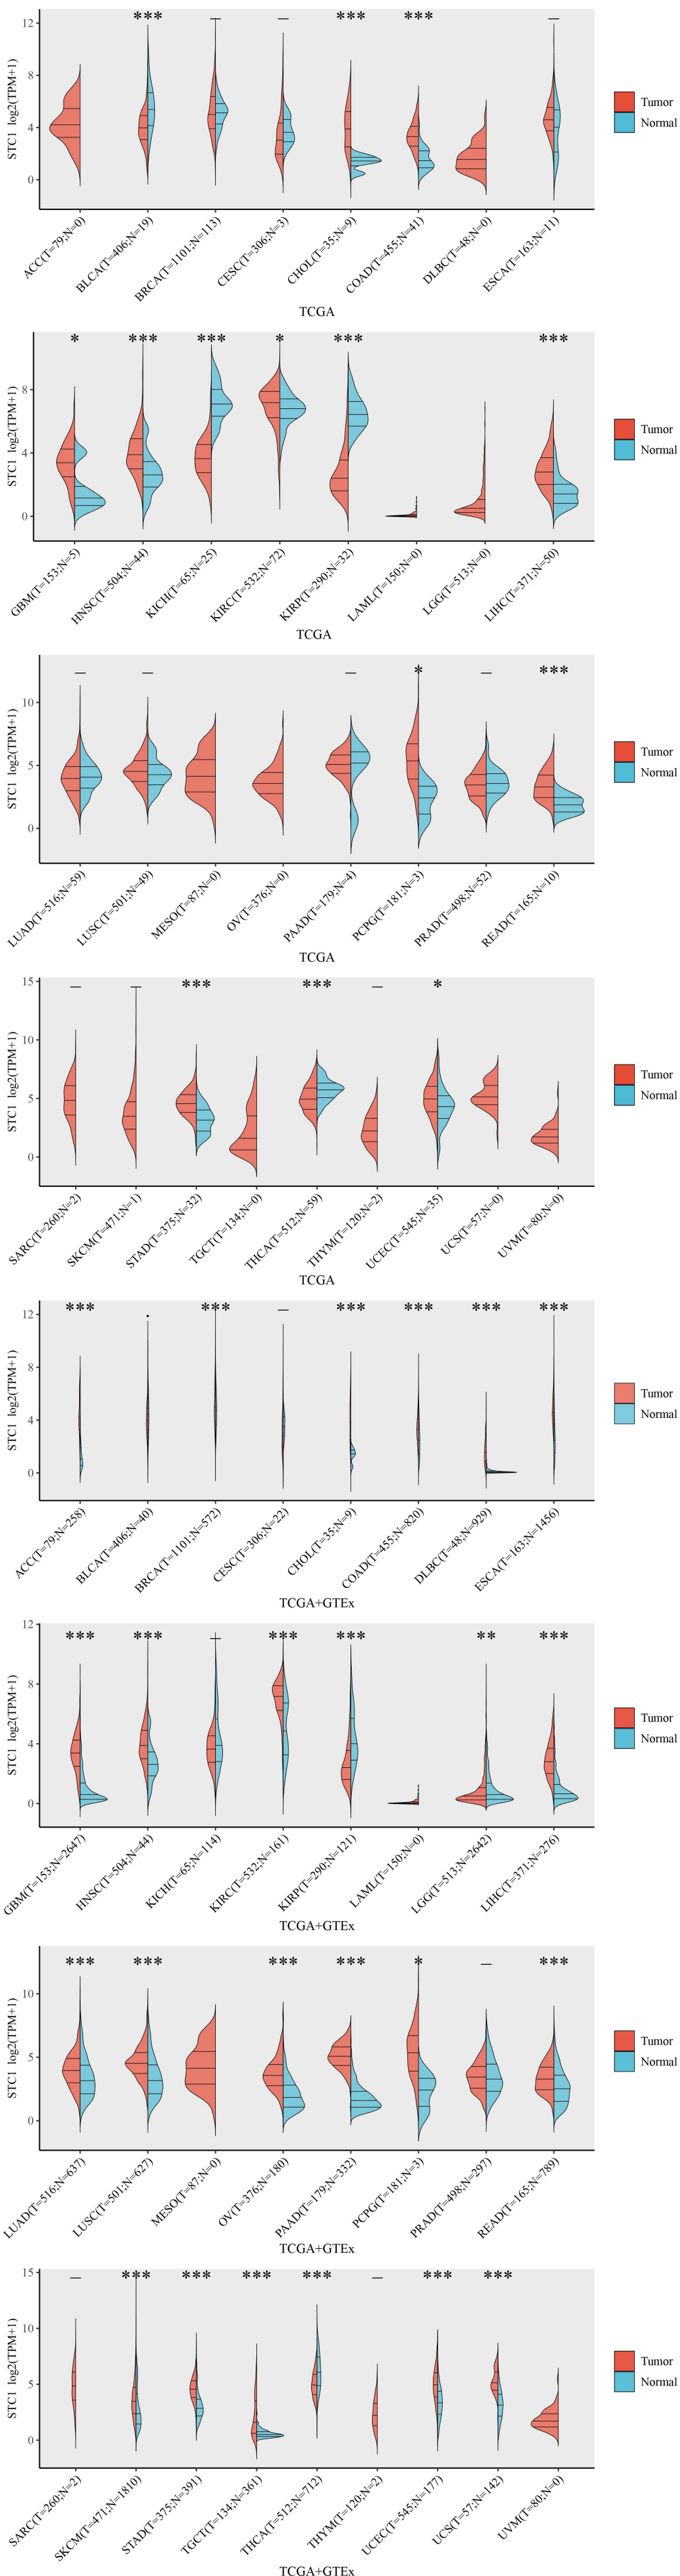

**Figure S4.** Pan-cancer analysis of STC1. -  $P > 0.05$ ; \* $P < 0.05$ ; \*\* $P < 0.01$ ; \*\*\* $P < 0.001$ ; rank-sum test. Tumor types (sample number): ACC (tumor=79, normal=0, GTEX=258); BLCA (tumor=406, normal=19, GTEX=21); BRCA (tumor=1101, normal=113, GTEX=459); CESC (tumor=306, normal=3, GTEX=19); CHOL (tumor=35, normal=9); COAD (tumor=455, normal=41, GTEX=779); DLBC (tumor=48, normal=0, GTEX=929); ESCA (tumor=163, normal=11, GTEX=1445); GBM (tumor=153, normal=5, GTEX=2642); HNSC (tumor=504, normal=44); KICH (tumor=65, normal=25, GTEX=89); KIRC (tumor=532, normal=72, GTEX=89); KIRP (tumor=290, normal=32, GTEX=89); LAML (tumor=150, normal=0); LGG (tumor=513, normal=0, GTEX=2642); LIHC (tumor=371, normal=50, GTEX=226); LUAD (tumor=516, normal=59, GTEX=578); LUSC (tumor=501, normal=49, GTEX=623); MESO (tumor=87, normal=0); OV (tumor=376, normal=0, GTEX=180); PAAD (tumor=179, normal=4, GTEX=328); PCPG (tumor=181, normal=3); PRAD (tumor=498, normal=52, GTEX=245); READ (tumor=165, normal=10, GTEX=779); SARC (tumor=260, normal=2); SKCM (tumor=471, normal=1, GTEX=1809); STAD (tumor=375, normal=32, GTEX=359); TGCT (tumor=134, normal=0, GTEX=391); THCA (tumor=512, normal=59, GTEX=653); THYM (tumor=120, normal=2); UCEC (tumor=545, normal=35, GTEX=142); UCS (tumor=57, normal=0, GTEX=142); UVM (tumor=80, normal=0).
